# Supplementary material for: Long intergenic non-protein coding RNA 324 prevents breast cancer progression by modulating miR-10b-5p
Source: publisher site journal article supplement (doi:10.18632/aging.103021), 2020-04-18
Supplement: Supplementary file [file aging-v12i8-103021-supplementary-material-SD1.pdf]

**SUPPLEMENTARY FIGURES**

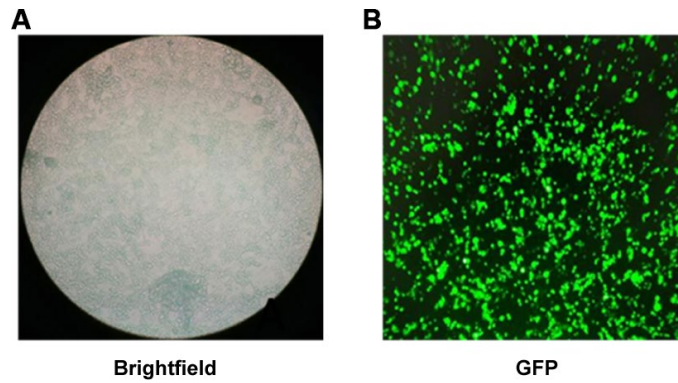

**Supplementary Figure 1. The transfection efficiency of LINC00324 in MDA-MB-231 cells.** (A, B) Brightfield and fluorescent microscopy of MDA-MB-231 cells stably expressing GFP 48 hours after transfection of LINC00324 overexpression vectors. Data are representative of three independent experiments with similar results.

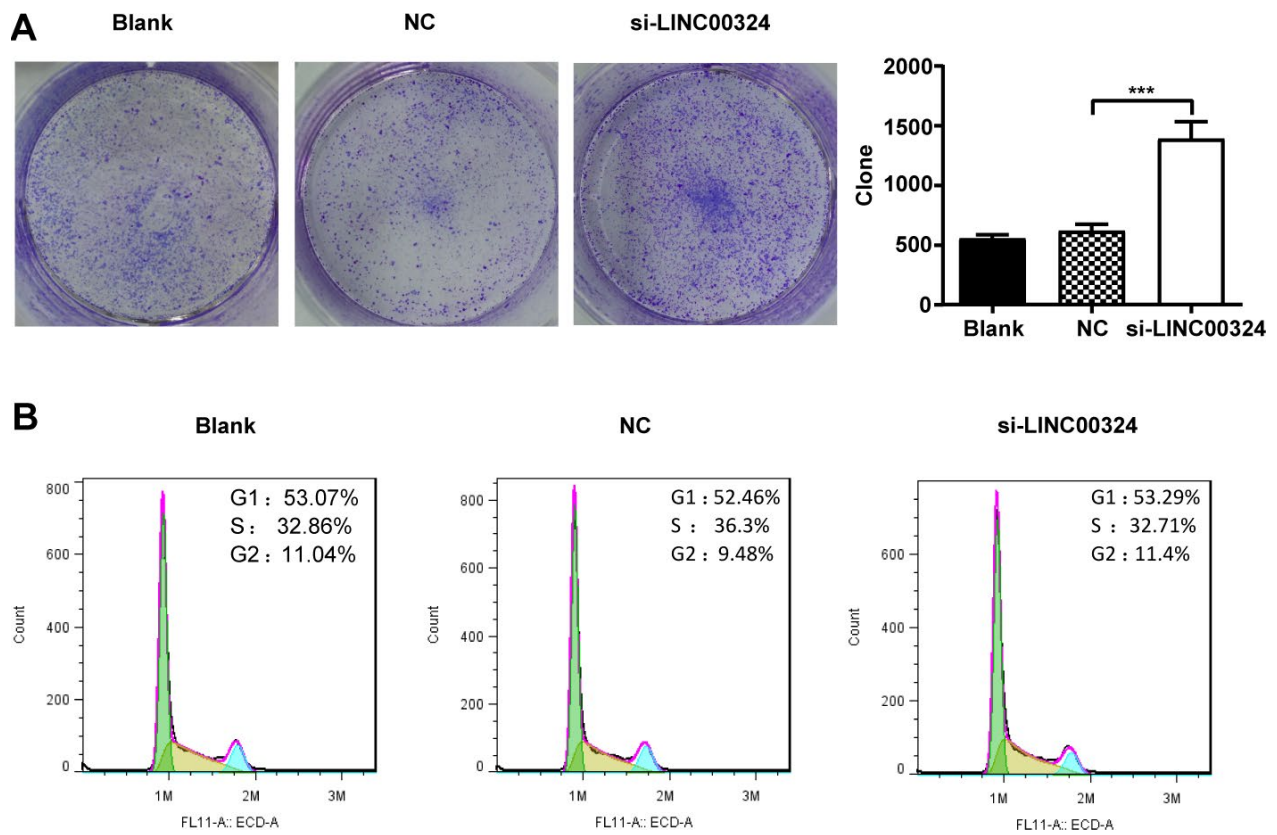

**Supplementary Figure 2. Relationship between expression of LINC00324 and proliferation of MCF-7 cells.** (A) Colony formation assays performed with the MCF-7 cells transfected with LINC00324 siRNA or the negative control siRNA. (B) Flow cytometry analysis of the percentage of cell cycle in MCF-7 cells transfected with LINC00324 siRNA or the negative control siRNA. \*\*\*p < 0.001. Data are from three independent experiments, or are representative of three independent experiments with similar results.

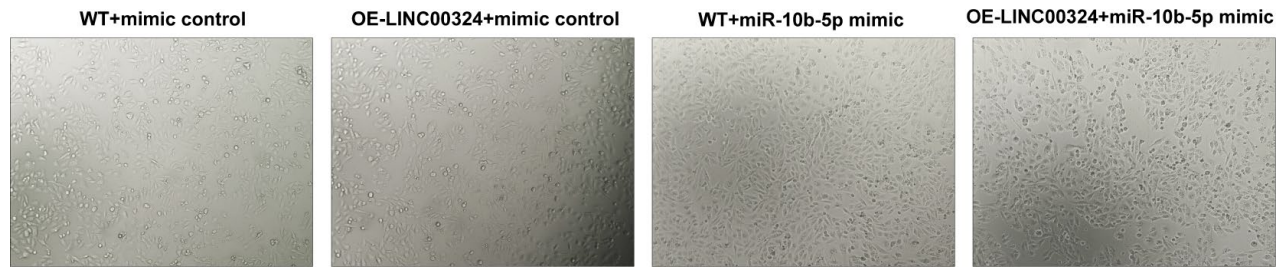

**Supplementary Figure 3. MDA-MB-231 cells tends to epithelial phenotype after LINC00324 overexpression.** Brightfield microscopy of MDA-MB-231 cells in indicated cells. Data are representative of three independent experiments with similar results.
