# Supplementary material for: Long intergenic non-protein coding RNA 324 prevents breast cancer progression by modulating miR-10b-5p
Source: publisher site journal article supplement (doi:10.18632/aging.103021), 2020-04-18
Supplement: Supplementary file [file aging-v12i8-103021-supplementary-material-SD2.pdf]

## SUPPLEMENTARY TABLES

**Supplementary Table 1. Correction between LINC00324 expression and clinicopathologic characteristics of breast cancer from TCGA and GEO database.**

| Characteristics          | n   | LINC00324 level | P value |
|--------------------------|-----|-----------------|---------|
| TNM Stage                |     |                 | 0.019   |
| I                        | 183 | 0.16±0.08       |         |
| II                       | 528 | 0.15±0.09       |         |
| III                      | 249 | 0.01±0.07       |         |
| Primary Tumor (T)        |     |                 | <0.0001 |
| T <sub>1</sub>           | 58  | 0.87±0.19       |         |
| T <sub>2</sub>           | 724 | 0.55±0.13       |         |
| T <sub>3</sub>           | 128 | 0.46±0.15       |         |
| T <sub>4</sub>           | 40  | 0.09±0.09       |         |
| Regional Lymph Nodes (N) |     |                 | 0.155   |
| N <sub>0</sub>           | 399 | 0.17±0.12       |         |
| N <sub>1</sub>           | 364 | 0.17±0.14       |         |
| N <sub>2</sub>           | 120 | 0.14±0.12       |         |
| N <sub>3</sub>           | 77  | 0.13±0.11       |         |
| Distant Metastasis (M)   |     |                 | 0.082   |
| M <sub>0</sub>           | 775 | 0.16±0.08       |         |
| M <sub>1</sub>           | 22  | 0.07±0.21       |         |
| M <sub>X</sub>           | 163 | 0.05±0.22       |         |

**Supplementary Table 2. Correction between LINC00324 expression and clinicopathologic characteristics of breast cancer patients.**

| Characteristics       | n  | LINC00324 level | P value |
|-----------------------|----|-----------------|---------|
| Age(years)            |    |                 | 0.366   |
| >35                   | 24 | 0.50±0.51       |         |
| ≤35                   | 15 | 0.65±0.40       |         |
| TNM Stage             |    |                 | <0.0001 |
| T <sub>1</sub>        | 8  | 0.87±0.49       |         |
| T <sub>2</sub>        | 18 | 0.66±0.06       |         |
| T <sub>3</sub>        | 6  | 0.28±0.08       |         |
| T <sub>4</sub>        | 7  | 0.09±0.06       |         |
| Lymph node metastasis |    |                 | 0.811   |
| Yes                   | 27 | 0.59±0.61       |         |
| No                    | 12 | 0.53±0.28       |         |
| ER                    |    |                 | 0.866   |
| positive              | 30 | 0.59±0.51       |         |
| negative              | 9  | 0.56±0.47       |         |
| PR                    |    |                 | 0.881   |
| positive              | 22 | 0.55±0.38       |         |
| negative              | 17 | 0.58±0.68       |         |
| Her-2                 |    |                 | 0.266   |
| positive              | 34 | 0.64±0.56       |         |
| negative              | 5  | 0.26±0.24       |         |
| Ki-67                 |    |                 | 0.166   |
| positive              | 21 | 0.69±0.56       |         |
| negative              | 18 | 0.46±0.39       |         |
